# Supplementary material for: A new versatile primer set targeting a short fragment of the mitochondrial COI region for metabarcoding metazoan diversity: application for characterizing coral reef fish gut contents
Source: Springer Nature journal article supplement (doi:10.1186/1742-9994-10-34), 2013-01-01

Universal Forward  
Primers

ygLCO1490  
dgLCO1490  
LCO1490

Internal Forward and  
Reverse Primers

mICOLintR  
mICOLintF

Universal Reverse  
Primers

ygHCO2198  
dgHCO2198  
HCO2198

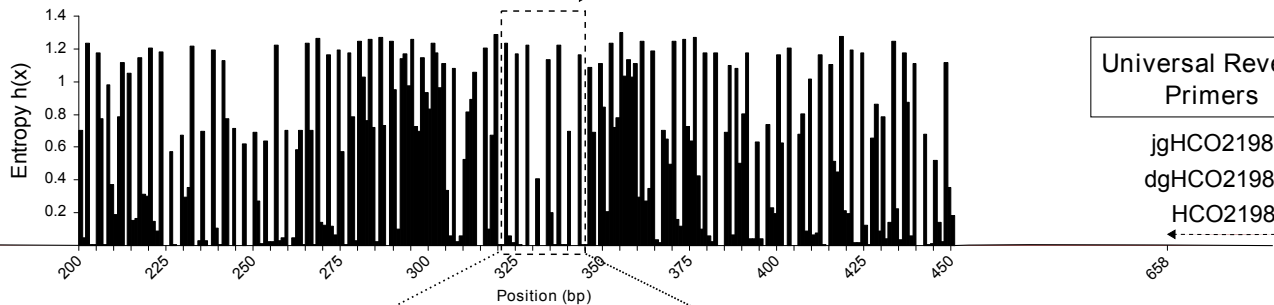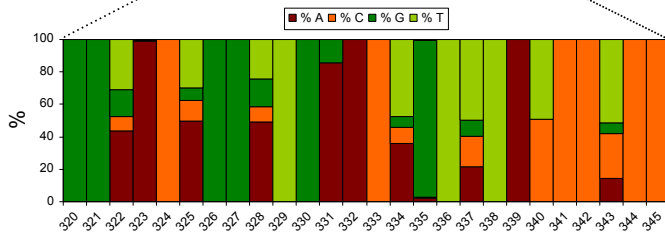

Supplement: 12983_2013_249_MOESM7_ESM.pdf [file 12983_2013_249_MOESM7_ESM.pdf]
