# Supplementary material for: A new versatile primer set targeting a short fragment of the mitochondrial COI region for metabarcoding metazoan diversity: application for characterizing coral reef fish gut contents
Source: Springer Nature journal article supplement (doi:10.1186/1742-9994-10-34), 2013-01-01
Supplement: 12983_2013_249_MOESM8_ESM.pdf [file 12983_2013_249_MOESM8_ESM.pdf]

## Workflow

## Computer programs

Denoising of flowgrams

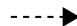

PYRONOISE [46] implemented  
in MOTHUR [45]

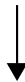

Alignment to reference barcode dataset  
&  
Removal of non functional sequences  
based on amino acid translations

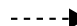

MACSE [47]

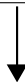

Chimera removal

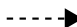

UCHIME [49]

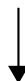

Clustering in  
Operational Taxonomic Units (OTUs)

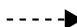

CROP [50]

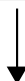

Taxonomic assignment

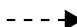

BLAST [53]  
SAP [54]
