# Supplementary material for: A new versatile primer set targeting a short fragment of the mitochondrial COI region for metabarcoding metazoan diversity: application for characterizing coral reef fish gut contents
Source: Springer Nature journal article supplement (doi:10.1186/1742-9994-10-34), 2013-01-01

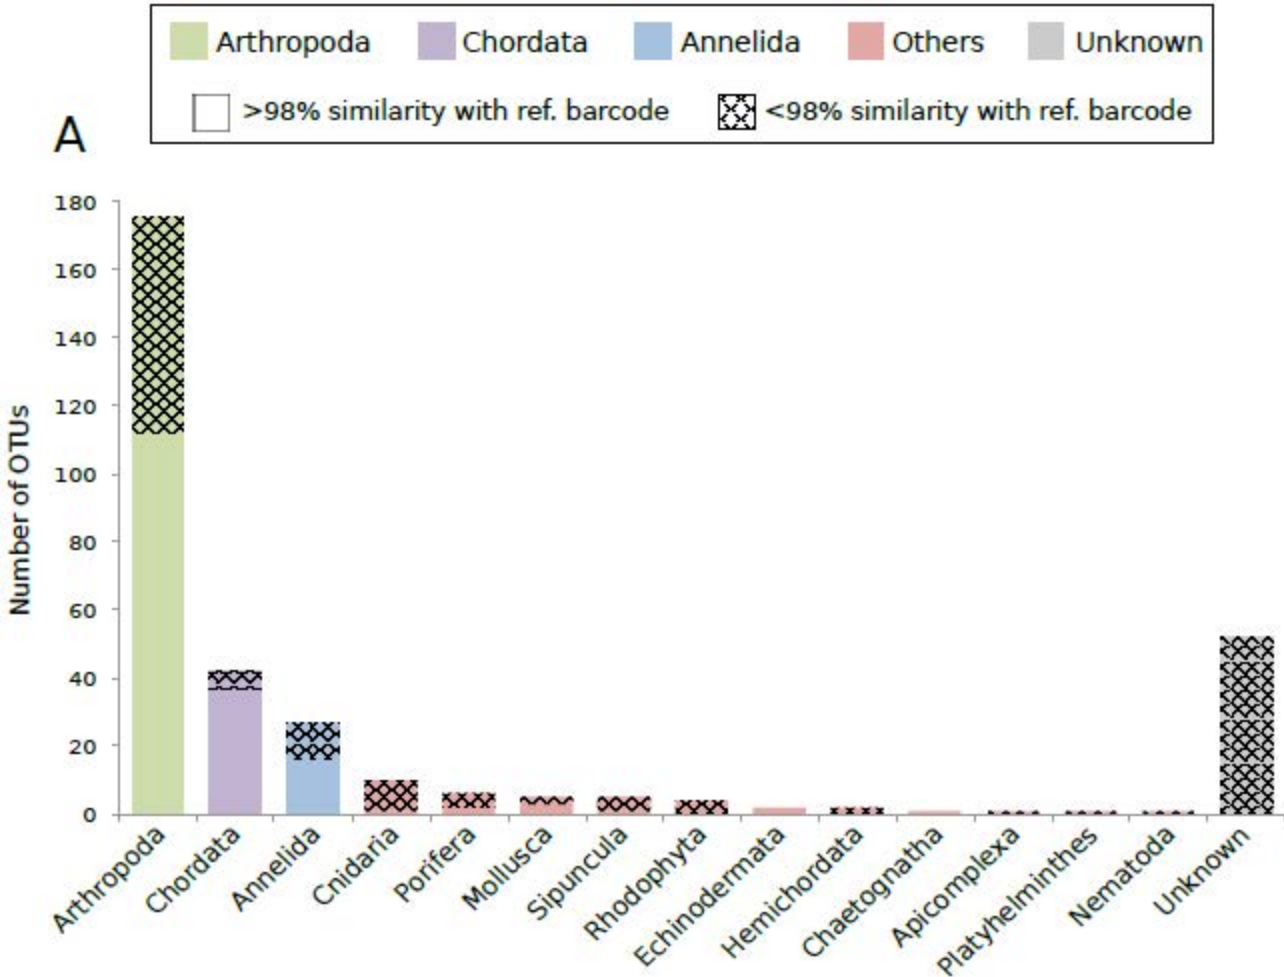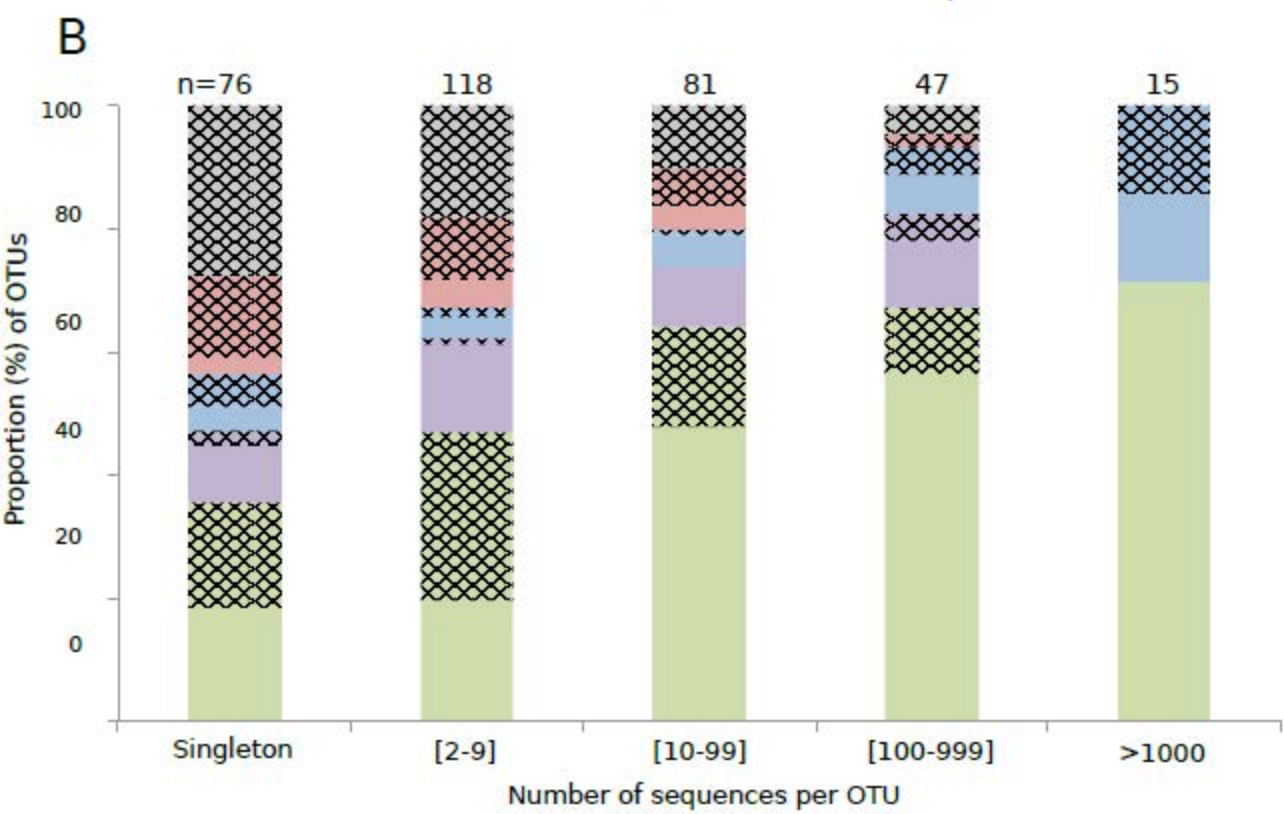

Supplement: 12983_2013_249_MOESM10_ESM.pdf [file 12983_2013_249_MOESM10_ESM.pdf]
